# Supplementary material for: Epidemiology and Natural History of Primary Biliary Cholangitis in the Chinese: A Territory-Based Study in Hong Kong between 2000 and 2015
Source: PubMed Central journal article supplement — Clin Transl Gastroenterol. 2017 Aug 31;8(8):e116–. doi: 10.1038/ctg.2017.43 (PMC5587844; doi:10.1038/ctg.2017.43), 2017-08-31
Supplement: ctg201743x1.pdf [file ctg201743x1.pdf]

**Supplementary Table 1. International Classification of Diseases (ICD)-9 code for outcome and covariates**

|                          |              |
|--------------------------|--------------|
| Hepatocellular carcinoma | 155.0        |
| Cirrhosis                | 571.5        |
| Esophageal varices       | 456.0, 456.1 |
| Gastric varices          | 456.8        |
| Ascites                  | 789.5        |
| Portal hypertension      | 572.3        |
| Hepatic encephalopathy   | 572.2        |
| Hepatorenal syndrome     | 572.4        |
